# Supplementary material for: Neonatal but not juvenile gene therapy reduces seizures and prolongs lifespan in SCN1B–Dravet syndrome mice
Source: JCI journal article supplement (doi:10.1172/jci182584), 2025-01-23

Original, uncropped blots shown in Figure 1

Figure 1, panel J

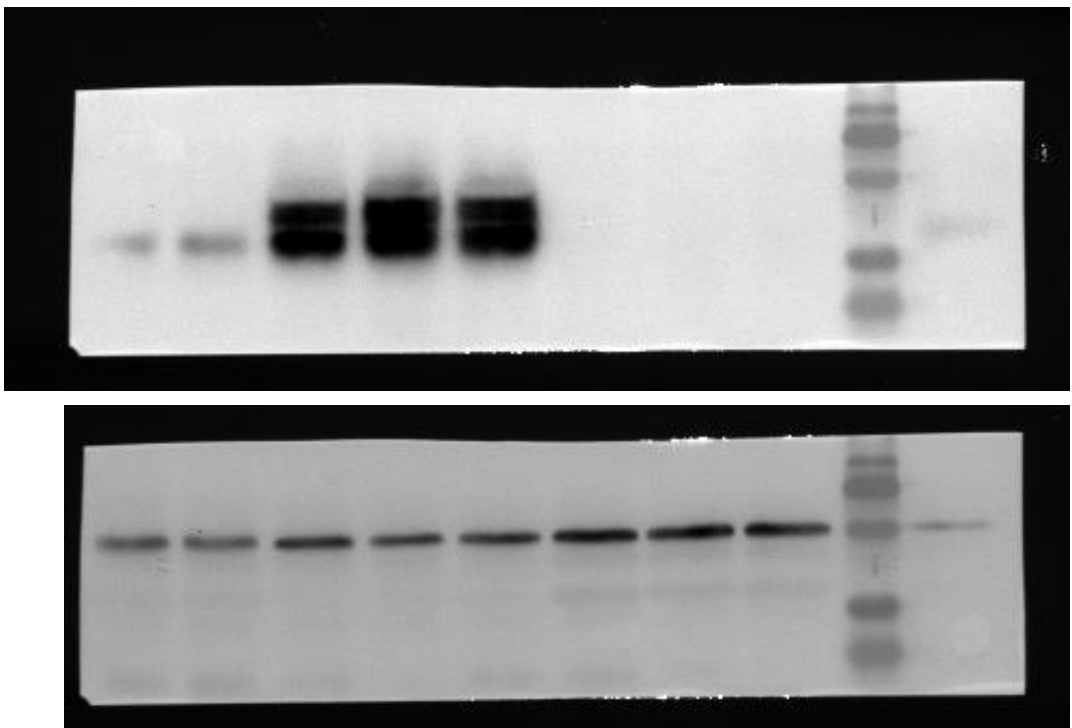

Figure 1, panel K

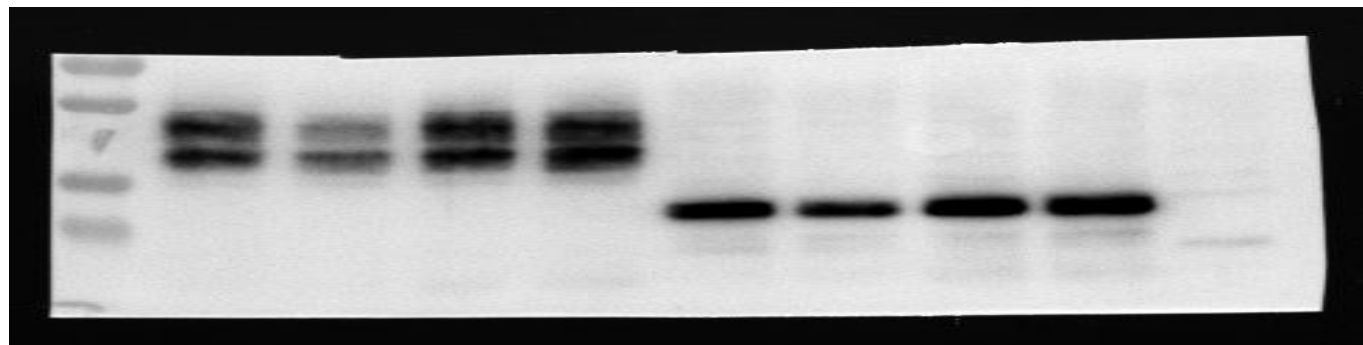

Supplement: sd2 [file 2]
